# Supplementary material for: Risk prediction models for contrast induced nephropathy: systematic review
Source: PubMed Central journal article supplement — BMJ. 2015 Aug 27;351:h4395. doi: 10.1136/bmj.h4395 (PMC4784870; doi:10.1136/bmj.h4395), 2015-08-27
Supplement: sils027294.ww_default.pdf [file sils027294.ww_default.pdf]

## Supplemental Material

### Supplemental Appendix 1: Search Strategy

#### Ovid MEDLINE(R) In-Process & Other Non-Indexed Citations and Ovid MEDLINE(R) 1946 to Present

|     |                                      |        |
|-----|--------------------------------------|--------|
| 1.  | exp Contrast Media/                  | 94047  |
| 2.  | exp Kidney Diseases/                 | 422318 |
| 3.  | 1 and 2                              | 6594   |
| 4.  | (contrast adj4 nephropathy).tw.      | 1630   |
| 5.  | (radiocontrast adj4 nephropathy).tw. | 209    |
| 6.  | 3 or 4 or 5                          | 7126   |
| 7.  | Risk Assessment/                     | 181868 |
| 8.  | risk factors/                        | 585036 |
| 9.  | (risk adj3 model*).tw.               | 12732  |
| 10. | score*.tw.                           | 539861 |
| 11. | Forecasting/                         | 71486  |
| 12. | prognostic factor*.tw.               | 63831  |
| 13. | "Predictive Value of Tests"/         | 148021 |
| 14. | predict*.tw.                         | 995239 |
| 15. | Statistics as Topic/                 | 83751  |
| 16. | statistic*.tw.                       | 709624 |
| 17. | exp Regression Analysis/             | 308099 |
| 18. | regression*.tw.                      | 435202 |
| 19. | (logistic adj2 model*).tw.           | 36450  |
| 20. | multivariate analysis/               | 89248  |
| 21. | (multivariate adj3 analysis).tw.     | 118001 |
| 22. | sn.fs.                               | 536852 |
| 23. | exp mathematical concepts/           | 744732 |
| 24. | exp Models, Biological/              | 637175 |
| 25. | exp models, statistical/             | 285177 |

|     |                                                                                                                                     |         |
|-----|-------------------------------------------------------------------------------------------------------------------------------------|---------|
| 26. | area under curve/                                                                                                                   | 27203   |
| 27. | algorithm*.tw.                                                                                                                      | 144845  |
| 28. | equation*.tw.                                                                                                                       | 119776  |
| 29. | 7 or 8 or 9 or 10 or 11 or 12 or 13 or 14 or 15<br>or 16 or 17 or 18 or 19 or 20 or 21 or 22 or 23<br>or 24 or 25 or 26 or 27 or 28 | 4359075 |
| 30. | 6 and 29                                                                                                                            | 2419    |
| 31. | remove duplicates from 30                                                                                                           | 2388    |
| 32. | remove duplicates from 30                                                                                                           | 2388    |
| 33. | limit 32 to yr="2013 -Current"                                                                                                      | 394     |

### **CINAHL Plus with Fulltext**

S30 S6 AND S28

Limiters - Published Date: 20130101-20151231

Search modes - Boolean/Phrase (129)

S29 S6 AND S28

Search modes - Boolean/Phrase (548) S28 S7 OR S8 OR S9 OR S10 OR S11 OR S12 OR S13 OR S14 OR S15 OR S16 OR S17 OR S18 OR S19 OR S20 OR S21 OR S22 OR S23 OR S24 OR S25 OR S26 OR S27 Search modes - Boolean/Phrase (940,296)

S27 equation\*

Search modes - Boolean/Phrase (12,439)

S26 algorithm\*

Search modes - Boolean/Phrase (27,002)

S25 (MH "algorithms")

Search modes - Boolean/Phrase (20,660)

S24 (MH "models, statistical")

|                                      |           |
|--------------------------------------|-----------|
| Search modes - Boolean/Phrase        | (18,559)  |
| S23 (MH "models, biological")        |           |
| Search modes - Boolean/Phrase        | 36,422)   |
| S22 (MH "mathematics")               |           |
| Search modes - Boolean/Phrase        | (9,431)   |
| S21 multivariate n3 analysis         |           |
| Search modes - Boolean/Phrase        | (58,327)  |
| S20 (MH "multivariate analysis")     |           |
| Search modes - Boolean/Phrase        | (38,608)  |
| S19 logistic n2 model*               |           |
| Search modes - Boolean/Phrase        | (8,116)   |
| S18 regression*                      |           |
| Search modes - Boolean/Phrase        | (210,240) |
| S17 (MH "regression+")               |           |
| Search modes - Boolean/Phrase        | (181,480) |
| S16 statistic*                       |           |
| Search modes - Boolean/Phrase        | (583,369) |
| S15 (MH "statistics")                |           |
| Search modes - Boolean/Phrase        | (8,229)   |
| S14 predict*                         |           |
| Search modes - Boolean/Phrase        | (159,083) |
| S13 (MH "predictive value of tests") |           |
| Search modes - Boolean/Phrase        | (30,587)  |
| S12 prognostic factor*               |           |
| Search modes - Boolean/Phrase        | (5,251)   |
| S11 (MH "forecasting")               |           |
| Search modes - Boolean/Phrase        | (10,425)  |
| S10 score*                           |           |
| Search modes - Boolean/Phrase        | (113,827) |
| S9 risk n3 model*                    |           |
| Search modes - Boolean/Phrase        | (3,487)   |

|                               |                              |           |
|-------------------------------|------------------------------|-----------|
| S8                            | (MH "risk factors")          |           |
| Search modes - Boolean/Phrase |                              | (105,271) |
| S7                            | (MH "risk assessment")       |           |
| Search modes - Boolean/Phrase |                              | (54,144)  |
| S6                            | S3 OR S4 OR S5               |           |
| Search modes - Boolean/Phrase |                              | (1,410)   |
| S5                            | radiocontrast n4 nephropathy |           |
| Search modes - Boolean/Phrase |                              | (37)      |
| S4                            | contrast n4 nephropathy      |           |
| Search modes - Boolean/Phrase |                              | (426)     |
| S3                            | S1 AND S2                    |           |
| Search modes - Boolean/Phrase |                              | (1,326)   |
| S2                            | (MH "kidney diseases+")      |           |
| Search modes - Boolean/Phrase |                              | (51,152)  |
| S1                            | (MH "contrast media+")       |           |
| Search modes - Boolean/Phrase |                              | (12,685)  |

### Embase Classic+Embase 1947 to 2015 Week 10

|    |                                      |        |
|----|--------------------------------------|--------|
| 1  | contrast induced nephropathy/        | 2493   |
| 2  | (contrast adj4 nephropathy).tw.      | 2656   |
| 3  | (radiocontrast adj4 nephropathy).tw. | 242    |
| 4  | 1 or 2 or 3                          | 3708   |
| 5  | risk assessment/                     | 351014 |
| 6  | risk factor/                         | 658874 |
| 7  | (risk adj3 model*).tw.               | 17192  |
| 8  | score*.tw.                           | 778242 |
| 9  | prognostic factor*.tw.               | 89510  |
| 10 | prediction/                          | 237512 |

|    |                                                                                                                       |         |
|----|-----------------------------------------------------------------------------------------------------------------------|---------|
| 11 | predict*.tw.                                                                                                          | 1266079 |
| 12 | exp statistics/                                                                                                       | 318716  |
| 13 | statistic*.tw.                                                                                                        | 998646  |
| 14 | exp regression analysis/                                                                                              | 269417  |
| 15 | regression*.tw.                                                                                                       | 590589  |
| 16 | (logistic adj2 model*).tw.                                                                                            | 49313   |
| 17 | multivariate analysis/                                                                                                | 110365  |
| 18 | (multivariate adj3 analysis).tw.                                                                                      | 167128  |
| 19 | mathematical phenomena/                                                                                               | 1825    |
| 20 | exp biological model/                                                                                                 | 979327  |
| 21 | statistical model/                                                                                                    | 107937  |
| 22 | area under the curve/                                                                                                 | 80886   |
| 23 | algorithm*.tw.                                                                                                        | 169460  |
| 24 | equation*.tw.                                                                                                         | 145853  |
| 25 | 5 or 6 or 7 or 8 or 9 or 10 or 11 or 12 or 13 or<br>14 or 15 or 16 or 17 or 18 or 19 or 20 or 21 or<br>22 or 23 or 24 | 5073659 |
| 26 | 4 and 25                                                                                                              | 1956    |
| 27 | limit 26 to embase                                                                                                    | 1828    |
| 28 | remove duplicates from 27                                                                                             | 1815    |
| 29 | limit 28 to yr="2013 -Current"                                                                                        | 568     |

## Supplementary Appendix 2: Criteria for measuring risk of bias and clinical usefulness

| Bias                           | Areas to Consider                                                                                                                                                                                                                                                                                                                                                                                                     |
|--------------------------------|-----------------------------------------------------------------------------------------------------------------------------------------------------------------------------------------------------------------------------------------------------------------------------------------------------------------------------------------------------------------------------------------------------------------------|
| Study participation            | <ul style="list-style-type: none"> <li>• Sample population matches the population of interest</li> <li>• Inclusion and exclusion criteria</li> <li>• Sampling frame and recruitment strategy, including methods to identify the study sample and the period/place of recruitment</li> <li>• Adequate participation in the study by eligible patients</li> <li>• Characteristics of baseline study sample</li> </ul>   |
| Study attrition                | <ul style="list-style-type: none"> <li>• Proportion of the study sample who complete the study</li> <li>• Attempts to collect data on patients who withdraw from the study</li> <li>• Reasons for loss to follow-up</li> <li>• Characteristics of patients loss to follow-up</li> <li>• Differences in characteristics and outcomes between patients who complete the study and patients lost to follow-up</li> </ul> |
| Prognostic factor selection    | <ul style="list-style-type: none"> <li>• Clear definitions of candidate predictors</li> <li>• Selection method for final model predictors</li> </ul>                                                                                                                                                                                                                                                                  |
| Prognostic factor measurement  | <ul style="list-style-type: none"> <li>• Clearly defined method of measurement for each predictor</li> <li>• Handling of each prognostic factor during model development (such as continuous or discrete)</li> <li>• Handling of missing data and methods for imputation</li> </ul>                                                                                                                                   |
| Outcome measurement            | <ul style="list-style-type: none"> <li>• Clearly defined outcomes</li> <li>• Outcome ascertainment that limits misclassification</li> <li>• Outcome follow-up period</li> </ul>                                                                                                                                                                                                                                       |
| Statistical analysis           | <ul style="list-style-type: none"> <li>• Sufficient data presentation to assess the results</li> <li>• Primary modelling method (such as logistic regression)</li> <li>• Appropriate use of alternative methods (such as competing risk or multiple event models)</li> <li>• Appropriate confounding variables included</li> </ul>                                                                                    |
| Reporting of model performance | <ul style="list-style-type: none"> <li>• Discrimination</li> <li>• Calibration</li> <li>• Reclassification, especially when models are compared to each other or another standard of care</li> </ul>                                                                                                                                                                                                                  |
| <b>Clinical Usefulness</b>     |                                                                                                                                                                                                                                                                                                                                                                                                                       |
| Utility                        | <ul style="list-style-type: none"> <li>• Risk categories provided that would trigger a diagnostic or therapeutic decision</li> <li>• Clinical trial data to demonstrate an effect on decision-making or clinical outcomes</li> </ul>                                                                                                                                                                                  |
| Usability                      | <ul style="list-style-type: none"> <li>• Simple risk calculator or nomogram to facilitate use at the bedside</li> <li>• Electronic or web-based calculator to facilitate use at the bedside</li> </ul>                                                                                                                                                                                                                |

\*Adapted from references 15 and 16.

### Supplemental Appendix 3: Included predictive models

| Study                                     | Variable Selection Procedure                                                                                      | Method for Missing Variables | No. of variables considered | Variables Considered in Final Model            | Variable Effect Reporting | Variable Effect (95% CI) | Variable Score |
|-------------------------------------------|-------------------------------------------------------------------------------------------------------------------|------------------------------|-----------------------------|------------------------------------------------|---------------------------|--------------------------|----------------|
| Bartholemew et al., 2004                  | Stepwise multivariable regression of significant variables on univariate                                          | NR                           | >50                         | Creatinine clearance <60 mL/min                | Odds Ratio                | 5 (3.6-6.9)              | 2              |
|                                           |                                                                                                                   |                              |                             | Intra-aortic balloon pump use                  |                           | 5.1 (3.6-7.2)            | 2              |
|                                           |                                                                                                                   |                              |                             | Urgent/Emergency procedure                     |                           | 4.4 (2.9-6.5)            | 2              |
|                                           |                                                                                                                   |                              |                             | Diabetes Mellitus                              |                           | 3.1 (2.3-4.2)            | 1              |
|                                           |                                                                                                                   |                              |                             | Congestive heart failure                       |                           | 2.2 (1.6-2.9)            | 1              |
|                                           |                                                                                                                   |                              |                             | Hypertension                                   |                           | 2.0 (1.4-2.8)            | 1              |
|                                           |                                                                                                                   |                              |                             | Peripheral vascular disease                    |                           | 1.9 (1.4-2.7)            | 1              |
|                                           |                                                                                                                   |                              |                             | Contrast > 260mL                               |                           | 1.8 (1.4-2.4)            | 1              |
| Chen et al., 2014                         | Univariate analysis to identify predictors; which were then applied in stepwise multivariable logistic regression | NR                           | NR                          | Age ≥70 years                                  | Odds Ratio                | 2.15 (1.58-2.94)         | 4              |
|                                           |                                                                                                                   |                              |                             | History of myocardial infarction               |                           | 2.63 (2.00-3.73)         | 5              |
|                                           |                                                                                                                   |                              |                             | Diabetes mellitus                              |                           | 2.13 (1.51-3.00)         | 4              |
|                                           |                                                                                                                   |                              |                             | Hypotension (sbp ≤ 90mmHg)                     |                           | 3.16 (1.66-6.98)         | 6              |
|                                           |                                                                                                                   |                              |                             | Left ventricular ejection fraction ≤45%        |                           | 2.11 (1.58-3.58)         | 4              |
|                                           |                                                                                                                   |                              |                             | Anemia (Hematocrit<39% men; <36% women)        |                           | 1.39 (1.01-1.95)         | 3              |
|                                           |                                                                                                                   |                              |                             | Estimated glomerular filtration rate <60mL/min |                           | 3.60 (2.79-6.92)         | 7              |
|                                           |                                                                                                                   |                              |                             | HDL <1                                         |                           | 1.45 (1.08-1.95)         | 3              |
| Urgent percutaneous coronary intervention | 1.46 (1.02-2.07)                                                                                                  | 3                            |                             |                                                |                           |                          |                |
| Fu et al., 2012                           | NR                                                                                                                | NR                           | 44                          | Estimated glomerular filtration rate <60mL/min | Odds Ratio                | 3.371 (1.959-5.801)      | 4              |
|                                           |                                                                                                                   |                              |                             | Left ventricular ejection fraction ≤45%        |                           | 2.609 (1.559-4.366)      | 3              |
|                                           |                                                                                                                   |                              |                             | Diabetes mellitus                              |                           | 2.798 (1.639-5.016)      | 3              |
|                                           |                                                                                                                   |                              |                             | Hypotension (sbp ≤ 90mmHg)                     |                           | 2.440 (1.138-5.234)      | 2              |
|                                           |                                                                                                                   |                              |                             | Anemia (Hemoglobin <11 grams/deciliter)        |                           | 2.227 (1.203-3.705)      | 2              |
|                                           |                                                                                                                   |                              |                             | Age >70 years                                  |                           | 1.781 (1.004-2.914)      | 2              |
|                                           |                                                                                                                   |                              |                             | Emergency percutaneous coronary intervention   |                           | 2.369 (1.384-4.134)      | 2              |
|                                           |                                                                                                                   |                              |                             | Myocardial infarction                          |                           | 2.263 (1.387-3.878)      | 2              |
| Contrast dose >200 mL                     | 2.200 (1.336-4.040)                                                                                               | 2                            |                             |                                                |                           |                          |                |
| Gao et al., 2014                          | Stepwise logistic regression                                                                                      | NR                           | 26                          | Age >60 years                                  | Odds Ratio                | 2.23 (1.44-3.45)         | 2              |
|                                           |                                                                                                                   |                              |                             | Hypertension                                   |                           | 2.02 (1.26-3.24)         | 2              |
|                                           |                                                                                                                   |                              |                             | Acute myocardial infarction                    |                           | 2.14 (1.43-3.20)         | 2              |
|                                           |                                                                                                                   |                              |                             | Congestive heart failure                       |                           | 2.21 (1.28-3.81)         | 2              |
|                                           |                                                                                                                   |                              |                             | Use of intra-aortic balloon pump               |                           | 3.90 (1.80-8.45)         | 4              |
|                                           |                                                                                                                   |                              |                             | Baseline estimated glomerular filtration rate  |                           |                          |                |
|                                           |                                                                                                                   |                              |                             | 89 to 70 mL/min                                |                           | 1.73 (1.07-2.80)         | 1              |
|                                           |                                                                                                                   |                              |                             | 69 to 50 mL/min                                |                           | 2.14 (1.25-3.64)         | 2              |
| 49 to 30 mL/min                           | 3.14 (1.52-6.48)                                                                                                  | 3                            |                             |                                                |                           |                          |                |

|                       |                                                                                                                                                                                    |    |    |                                                                                                                                                                                                                                                                                                                                                                    |            |                                                                                                   |                       |
|-----------------------|------------------------------------------------------------------------------------------------------------------------------------------------------------------------------------|----|----|--------------------------------------------------------------------------------------------------------------------------------------------------------------------------------------------------------------------------------------------------------------------------------------------------------------------------------------------------------------------|------------|---------------------------------------------------------------------------------------------------|-----------------------|
|                       |                                                                                                                                                                                    |    |    | <30 mL/min<br>Contrast volume:<br>>100 to ≤300 mL<br>>300 mL                                                                                                                                                                                                                                                                                                       |            | 6.66 (2.19-20.21)<br>1.76 (1.05-2.97)<br>3.63 (1.75-7.51)                                         | 6<br>1<br>3           |
| Ghani et al.,<br>2009 | Forward<br>selection                                                                                                                                                               | NR | NR | Baseline Creatinine ≥115 umol/L<br>Shock<br>Female gender<br>Multivessel percutaneous coronary intervention<br>Diabetes mellitus                                                                                                                                                                                                                                   | Odds Ratio | 13.06 (6.61-25.8)<br>3.83 (1.69-8.69)<br>2.43 (1.24-4.75)<br>2.37 (1.21-4.64)<br>2.14 (1.01-4.53) | 7<br>3<br>2<br>2<br>2 |
| Gurm et al.,<br>2013  | Forest                                                                                                                                                                             | NR | 46 | Percutaneous coronary intervention indication<br>Percutaneous coronary intervention status<br>Coronary artery disease presentation<br>Cardiogenic shock<br>Congestive heart failure within 2 weeks<br>Pre-percutaneous coronary intervention LVEF<br>Diabetes mellitus<br>Age<br>Weight<br>Height<br>CK-MB<br>Creatinine<br>Hemoglobin<br>Troponin I<br>Troponin T |            | Web-based – NR                                                                                    | Web-based score       |
| Liu et al.,<br>2015   | Univariate<br>analysis to<br>identify<br>predictors along<br>with other<br>known CIN risk<br>factors were<br>entered into<br>multivariate<br>logistic<br>regression<br>analysis by | NR | 26 | Age ≥ 75 years<br>Left ventricular ejection fraction < 40%<br>Baseline creatinine > 1.5mg/dL                                                                                                                                                                                                                                                                       | Odds Ratio | 4.43<br>3.58<br>8.99                                                                              | 1<br>1<br>2           |



|                      |                                                                                     |          |    |                                                                                                                                                                                                                                                                                                                                                                                                                                                                                                                                                                                                |            |                                                                                                                                                                                                                                                                                                                                                                                                                    |                                                                                                                                                                                                                                           |
|----------------------|-------------------------------------------------------------------------------------|----------|----|------------------------------------------------------------------------------------------------------------------------------------------------------------------------------------------------------------------------------------------------------------------------------------------------------------------------------------------------------------------------------------------------------------------------------------------------------------------------------------------------------------------------------------------------------------------------------------------------|------------|--------------------------------------------------------------------------------------------------------------------------------------------------------------------------------------------------------------------------------------------------------------------------------------------------------------------------------------------------------------------------------------------------------------------|-------------------------------------------------------------------------------------------------------------------------------------------------------------------------------------------------------------------------------------------|
|                      | forward stepwise selection                                                          |          |    |                                                                                                                                                                                                                                                                                                                                                                                                                                                                                                                                                                                                |            |                                                                                                                                                                                                                                                                                                                                                                                                                    |                                                                                                                                                                                                                                           |
| Mehran et al., 2004  | Risk factors significant in univariate analysis were included in a bootstrap sample | Excluded | NR | <p>Model A (Cr):</p> <p>Hypotension (sbp &lt;80 mmHg)</p> <p>Intra-aortic balloon pump use</p> <p>Congestive heart failure</p> <p>Serum creatinine&gt;1.5mg/dl</p> <p>Age&gt;75</p> <p>Anemia (Hematocrit&lt;39% men; &lt;36% women)</p> <p>Diabetes mellitus</p> <p>Contrast volume</p><br><p>Model B (eGFR):</p> <p>Congestive heart failure</p> <p>Hypotension (sbp &lt;80 mmHg)</p> <p>Intra-aortic balloon pump use</p> <p>Age&gt;75</p> <p>Anemia (Hematocrit&lt;39% men; &lt;36% women)</p> <p>Diabetes mellitus</p> <p>Contrast volume</p> <p>Estimated glomerular filtration rate</p> | Odds Ratio | <p>2.537 (1.97-3.26)</p> <p>2.438 (1.68-3.54)</p> <p>2.250 (1.68-3.01)</p> <p>2.053 (1.59-2.66)</p> <p>1.847 (1.51-2.26)</p> <p>1.601 (1.33-1.93)</p> <p>1.508 (1.26-1.81)</p> <p>1.290 (1.21-1.38)</p><br><p>2.698 (2.02-3.60)</p> <p>2.676 (2.08-3.44)</p> <p>2.547 (1.75-3.71)</p> <p>2.195 (1.78-2.71)</p> <p>1.827 (1.52-2.20)</p> <p>1.597 (1.34-1.91)</p> <p>1.276 (1.20-1.36)</p> <p>1.194 (1.20-1.30)</p> | <p>5</p> <p>5</p> <p>5</p> <p>4</p> <p>4</p> <p>3</p> <p>3</p> <p>1 for 100mL</p><br><p>5</p> <p>5</p> <p>5</p> <p>4</p> <p>3</p> <p>3</p> <p>1 for 100mL</p> <p>2 for 40-60mL/min</p> <p>4 for 20-40mL/min</p> <p>6 for &lt;20mL/min</p> |
| Maioli et al., 2010  | Stepwise logistic regression                                                        | Excluded | NR | <p>One procedure within the past 72h</p> <p>Left ventricular ejection fraction≤45%</p> <p>Pre-procedure creatinine&gt;Baseline creatinine</p> <p>Baseline creatinine≥1.5mg/dL</p> <p>Diabetes mellitus</p> <p>Creatinine clearance≤44ml/min</p> <p>Age≥73 years</p>                                                                                                                                                                                                                                                                                                                            | Odds Ratio | <p>4.47 (2.08-11.24)</p> <p>3.46 (2.08-5.78)</p> <p>3.23 (1.77-5.90)</p> <p>3.10 (1.63-5.89)</p> <p>2.78 (1.62-4.81)</p> <p>2.65 (1.45-4.59)</p> <p>2.40(1.32-4.34)</p>                                                                                                                                                                                                                                            | <p>3</p> <p>2</p> <p>2</p> <p>2</p> <p>2</p> <p>2</p> <p>1</p>                                                                                                                                                                            |
| Marenzi et al., 2004 | Logistic regression of confounders                                                  | NR       | NR | <p>Age ≥75 years</p> <p>Anterior myocardial infarction</p> <p>Time to reperfusion ≥6hours</p> <p>Contrast agent volume ≥300mL</p>                                                                                                                                                                                                                                                                                                                                                                                                                                                              | Odds Ratio | <p>5.28 (1.98-14.05)</p> <p>2.17 (0.88-5.34)</p> <p>2.51 (1.01-6.16)</p> <p>2.80 (1.17-6.68)</p>                                                                                                                                                                                                                                                                                                                   | <p>1</p> <p>1</p> <p>1</p> <p>1</p>                                                                                                                                                                                                       |

|                      |                                                                                                                     |         |    |                                                                                                              |            |                      |                 |
|----------------------|---------------------------------------------------------------------------------------------------------------------|---------|----|--------------------------------------------------------------------------------------------------------------|------------|----------------------|-----------------|
|                      |                                                                                                                     |         |    | Use of intra-aortic balloon pump                                                                             |            | 15.51 (4.65-51.64)   | 1               |
| Tziakas et al., 2013 | Logistic regression                                                                                                 | Exclude | 50 | Pre-existing renal disease                                                                                   | Odds Ratio | 7.08 (2.22-22.61)    | 2               |
|                      |                                                                                                                     |         |    | Metformin                                                                                                    |            | 13.7 (3.41-54.94)    | 2               |
|                      |                                                                                                                     |         |    | Hx of prior percutaneous coronary intervention                                                               |            | 4.37 (1.94-9.89)     | 1               |
|                      |                                                                                                                     |         |    | Peripheral artery disease                                                                                    |            | 8.58 (2.31-31.82)    | 2               |
|                      |                                                                                                                     |         |    | Contrast volume <300mL                                                                                       |            | 2.38 (1.19-4.74)     | 1               |
| Victor et al., 2014  | Univariate analysis to identify predictors; multivariate logistic regression analysis by forward stepwise selection | Exclude | 40 | Creatinine clearance                                                                                         | Odds ratio | 7.46 (4.46-12.47)    | Web-based score |
|                      |                                                                                                                     |         |    | Amount of contrast                                                                                           |            | 51.65 (12.62-211.32) |                 |
|                      |                                                                                                                     |         |    | Hemoglobin                                                                                                   |            | 1.58 (1.01-2.46)     |                 |
|                      |                                                                                                                     |         |    | Diabetic microangiopathy                                                                                     |            | 21.94 (11.87-40.57)  |                 |
|                      |                                                                                                                     |         |    | Hypotension (sbp <80 mm Hg for at least 1 hour requiring inotropic support within 24 hours periprocedurally) |            | 13.55 (7.12-25.81)   |                 |
|                      |                                                                                                                     |         |    | Albuminuria                                                                                                  |            | 8.10 (4.97-13.21)    |                 |
|                      |                                                                                                                     |         |    | Peripheral vascular disease                                                                                  |            | 10.94 (5.02-23.84)   |                 |

**Abbreviations:** **NR:** not reported; **sbp:** systolic blood pressure; **mmHg:** millimeters mercury; **mg/dL:** milligrams per deciliter.
